# Supplementary material for: Transmissive to black electrochromic aramids with high near-infrared and multicolor electrochromism based on electroactive tetraphenylbenzidine units
Source: Royal Society of Chemistry journal article supplement (doi:10.1039/c1jm10210a), 2011-01-01
Supplement: c1jm10210a.pdf [file c1jm10210a.pdf]

## Supporting Information

*for*

### **Transmissive to Black Electrochromic Aramids with High Near-Infrared and Multicolor Electrochromism Based on Electroactive Tetraphenylbenzidine Units** *by*

*Hung-Ju Yen, Kun-Ying Lin, and Guey-Sheng Liou\**

Functional Polymeric Materials Laboratory, Institute of Polymer Science and Engineering,  
National Taiwan University, Taipei, Taiwan

Tel: +886-2-336-5315; Fax: +886-2-336-5237; E-mail: [gsliou@ntu.edu.tw](mailto:gsliou@ntu.edu.tw)

#### **List of Contents for Supplementary Material:**

---

|                                                                                                                 |              |
|-----------------------------------------------------------------------------------------------------------------|--------------|
| <b>Table S1.</b> Inherent Viscosity and Molecular Weights of Polyamides .....                                   | <u>SI-2</u>  |
| <b>Table S2.</b> Solubility Behavior of Polyamides.....                                                         | <u>SI-3</u>  |
| <b>Table S3.</b> Thermal Properties of Polyamides.....                                                          | <u>SI-4</u>  |
| <b>Figure S1.</b> (a) <sup>1</sup> H NMR and (b) <sup>13</sup> C NMR spectra of dinitro compound <b>1</b> ..... | <u>SI-5</u>  |
| <b>Figure S2.</b> (a) <sup>1</sup> H NMR and (b) <sup>13</sup> C NMR spectra of diamine monomer <b>2</b> .....  | <u>SI-6</u>  |
| <b>Figure S3.</b> 2D (a) H-H COSY and (b) C-H HMQC NMR spectra of dinitro compound <b>1</b><br>.....            | <u>SI-7</u>  |
| <b>Figure S4.</b> 2D (a) H-H COSY and (b) C-H HMQC NMR spectra of diamine monomer <b>2</b><br>.....             | <u>SI-8</u>  |
| <b>Figure S5.</b> IR spectrum of polyamide <b>Ib</b> film .....                                                 | <u>SI-9</u>  |
| <b>Figure S6.</b> TGA thermograms of polyamides <b>Ib</b> and <b>I'b</b> at a scan rate of 20 °C/min .....      | <u>SI-10</u> |
| <b>Figure S7.</b> DSC traces of polyamides with a heating rate of 20 °C/min in nitrogen .....                   | <u>SI-11</u> |

**Table S1.** Inherent Viscosity and Molecular Weights of Polyamides

| Code       | $\eta_{\text{inh}}^a$ (dL/g) | $M_w^b$ | $M_n^b$ | PDI <sup>c</sup> |
|------------|------------------------------|---------|---------|------------------|
| <b>Ia</b>  | 0.91                         | 95,900  | 58,100  | 1.65             |
| <b>Ib</b>  | 0.76                         | 94,600  | 60,500  | 1.56             |
| <b>Ic</b>  | 0.75                         | 102,500 | 69,600  | 1.47             |
| <b>I'a</b> | 0.52                         | 45,800  | 32,400  | 1.41             |
| <b>I'b</b> | 0.42                         | 125,600 | 72,700  | 1.73             |
| <b>I'c</b> | 0.42                         | 89,300  | 47,200  | 1.89             |
| <b>IIb</b> | 0.63                         | 95,700  | 52,700  | 1.82             |

<sup>a</sup> Measured at a polymer concentration of 0.5 g/dL in DMAc at 30 °C (**I'a** measured in NMP).

<sup>b</sup> Calibrated with polystyrene standards, using DMF as eluent at a constant flow rate of 1 ml/min at 70 °C.

<sup>c</sup> Polydispersity Index ( $M_w/M_n$ ).

**Table S2.** Solubility Behavior of Polyamides

| Code       | Solubility in various Solvent <sup>a</sup> |      |     |      |                  |     |                   |
|------------|--------------------------------------------|------|-----|------|------------------|-----|-------------------|
|            | NMP                                        | DMAc | DMF | DMSO | <i>m</i> -cresol | THF | CHCl <sub>3</sub> |
| <b>Ia</b>  | ++                                         | ++   | +-  | -    | ++               | -   | -                 |
| <b>Ib</b>  | ++                                         | ++   | ++  | +-   | ++               | -   | -                 |
| <b>Ic</b>  | ++                                         | ++   | ++  | ++   | ++               | ++  | -                 |
| <b>I'a</b> | ++                                         | +-   | +-  | -    | -                | -   | -                 |
| <b>I'b</b> | ++                                         | ++   | ++  | -    | ++               | -   | -                 |
| <b>I'c</b> | ++                                         | ++   | ++  | +-   | ++               | ++  | -                 |
| <b>IIb</b> | ++                                         | ++   | ++  | +-   | ++               | +-  | -                 |

<sup>a</sup> The solubility was determined with a 5 mg sample in 1 mL of a solvent. ++, soluble at room temperature; +, soluble on heating; +-, partially soluble or swelling; -, insoluble even on heating. THF: tetrahydrofuran; CHCl<sub>3</sub>: chloroform.

**Table S3.** Thermal Properties of Polyamides

| Polymer <sup>a</sup> | $T_g$ (°C) <sup>b</sup> | $T_d^5$ (°C) <sup>c</sup> |     | $T_d^{10}$ (°C) <sup>c</sup> |     | $R_{w800}$ (%) <sup>d</sup> |
|----------------------|-------------------------|---------------------------|-----|------------------------------|-----|-----------------------------|
|                      |                         | N <sub>2</sub>            | Air | N <sub>2</sub>               | Air |                             |
| <b>Ia</b>            | 280                     | 475                       | 465 | 495                          | 495 | 53                          |
| <b>Ib</b>            | 270                     | 495                       | 485 | 530                          | 540 | 70                          |
| <b>Ic</b>            | 290                     | 495                       | 510 | 535                          | 560 | 68                          |
| <b>I'a</b>           | 315                     | 450                       | 440 | 475                          | 490 | 59                          |
| <b>I'b</b>           | 290                     | 490                       | 480 | 585                          | 570 | 71                          |
| <b>I'c</b>           | 295                     | 520                       | 495 | 575                          | 555 | 73                          |

<sup>a</sup> The polymer film samples were heated at 300 °C for 1 h prior to all the thermal analyses.

<sup>b</sup> Midpoint temperature of baseline shift on the second DSC heating trace (rate: 20 °C /min) of the sample after quenching from 400 °C to 50 °C (rate: 200 °C /min) in nitrogen.

<sup>c</sup> Temperature at which 5 % and 10% weight loss occurred, respectively, recorded by TGA at a heating rate of 20 °C/min and a gas flow rate of 20 cm<sup>3</sup>/min.

<sup>d</sup> Residual weight percentages at 800 °C under nitrogen flow.

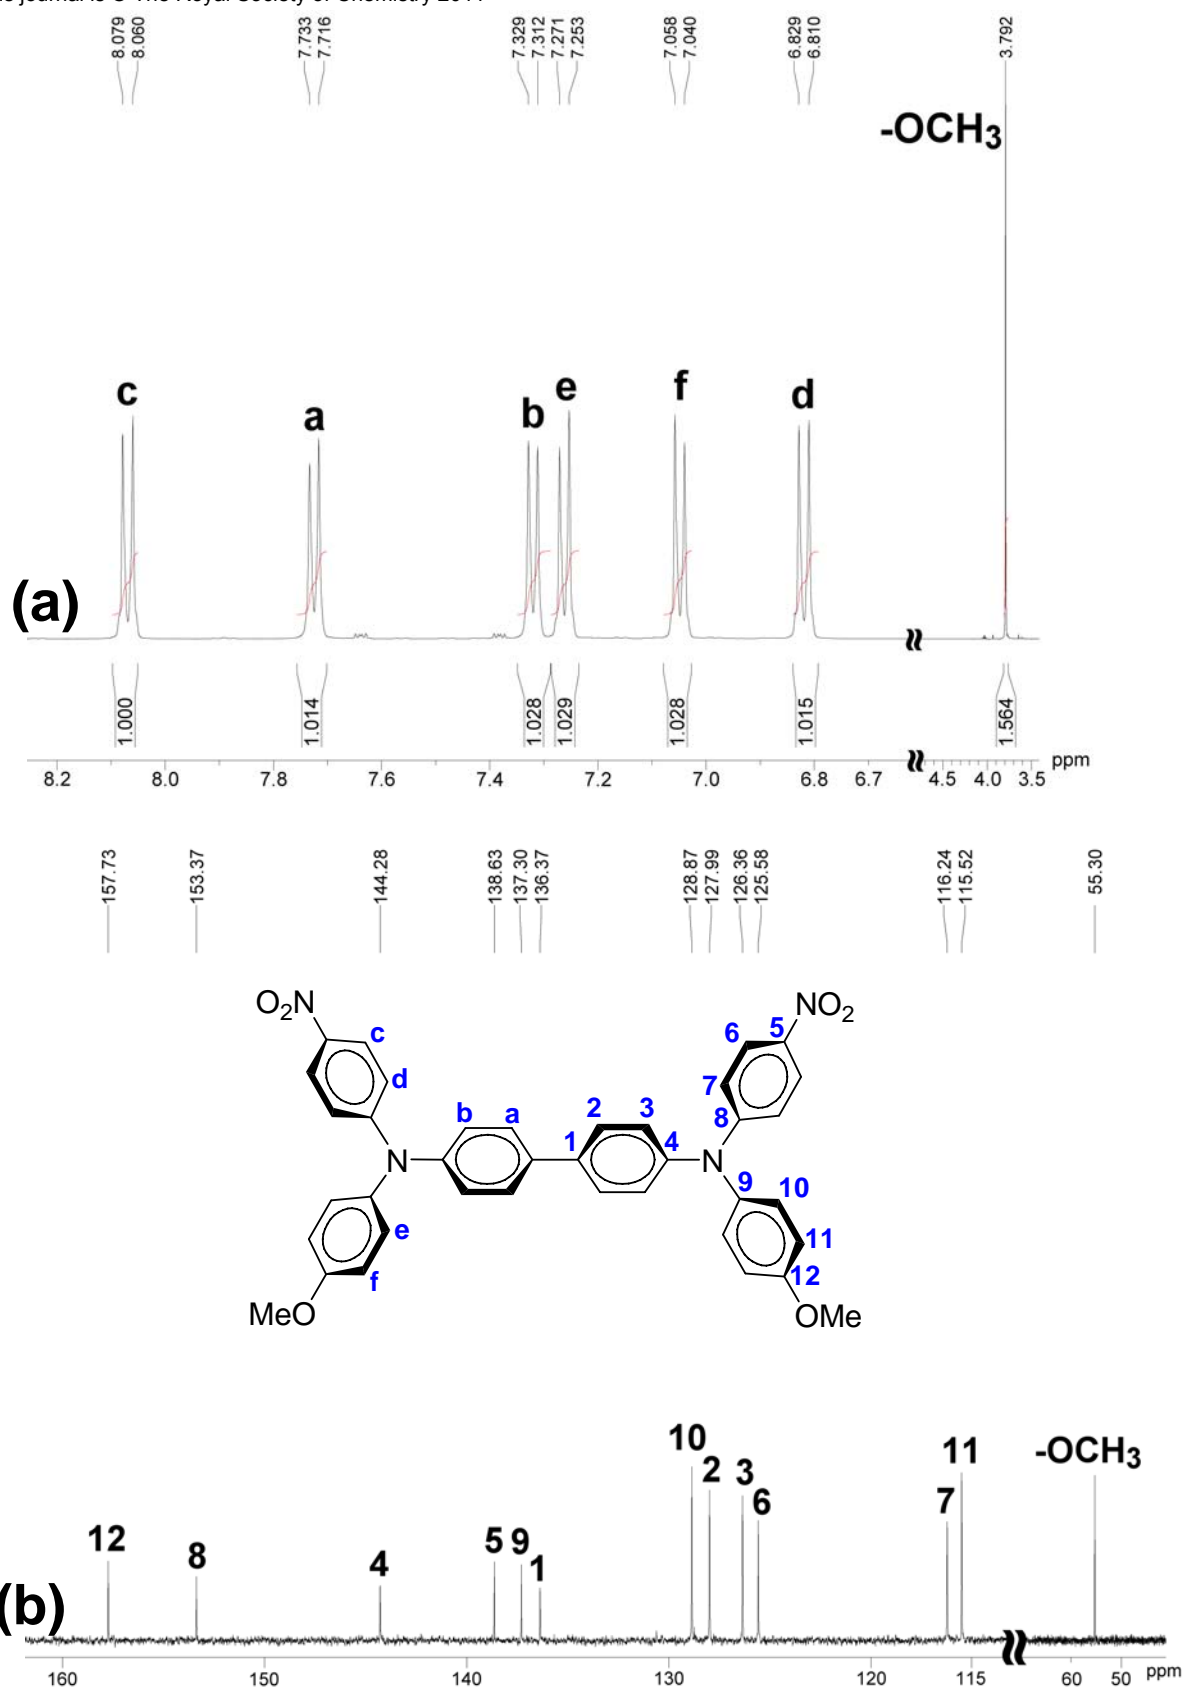

**Figure S1.** (a)  $^1\text{H}$  NMR and (b)  $^{13}\text{C}$  NMR spectra of dinitro compound **1** in  $\text{DMSO-}d_6$ .

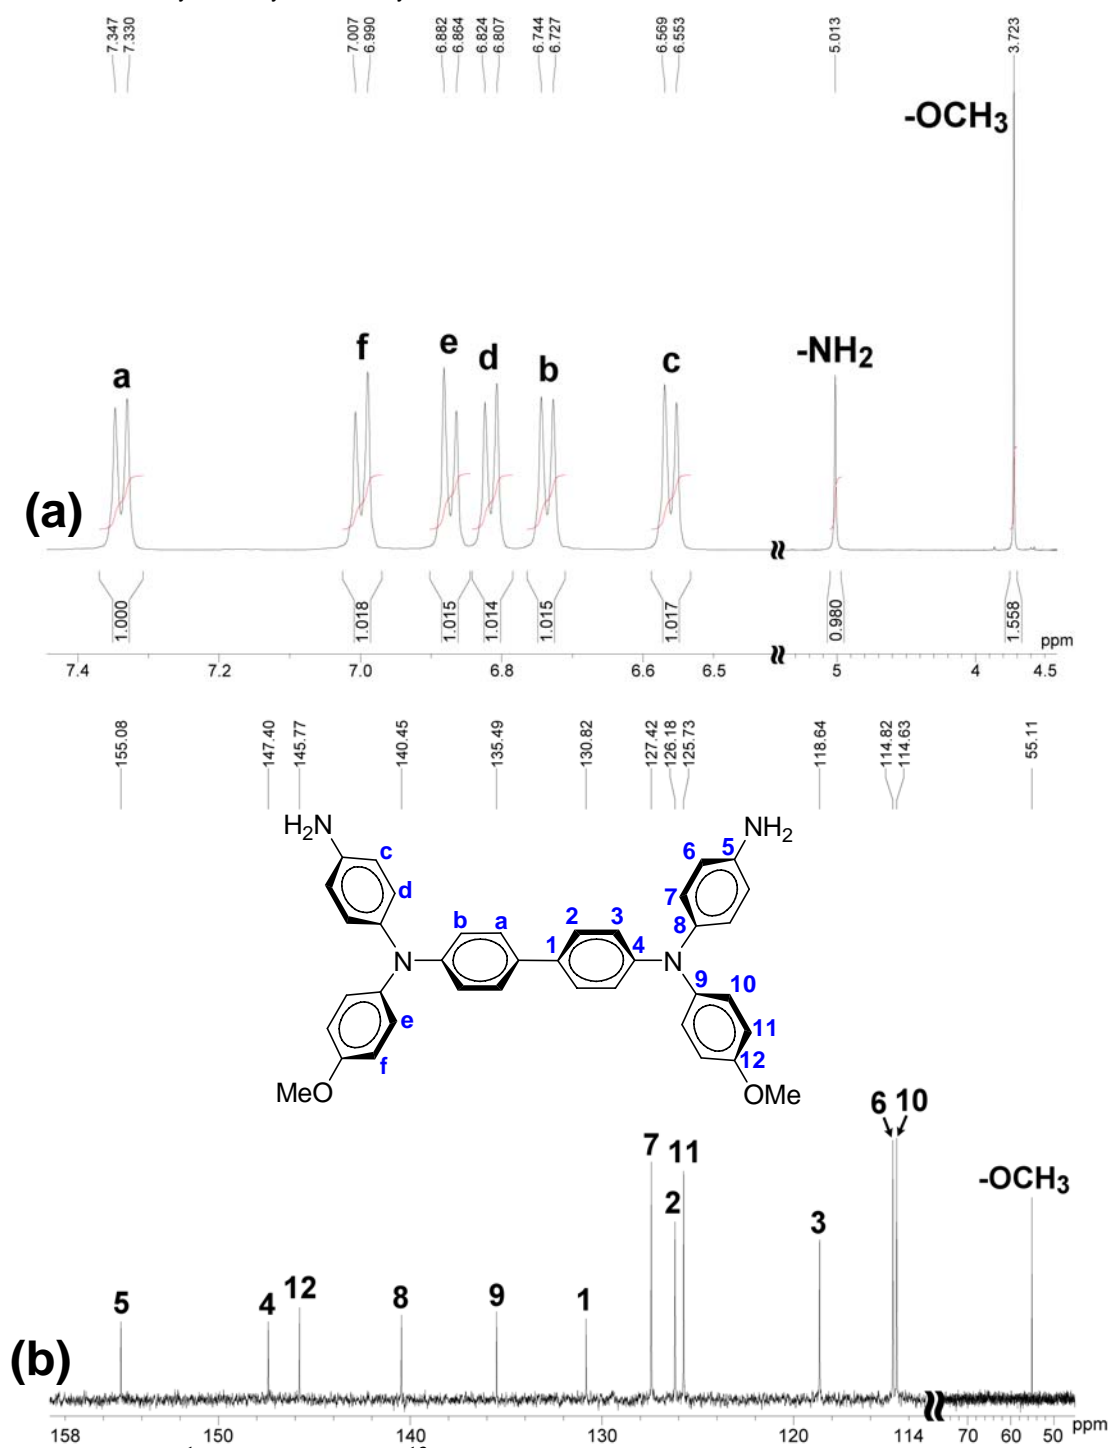

**Figure S2.** (a)  $^1\text{H}$  NMR and (b)  $^{13}\text{C}$  NMR spectra of diamine monomer **2** in  $\text{DMSO-}d_6$ .

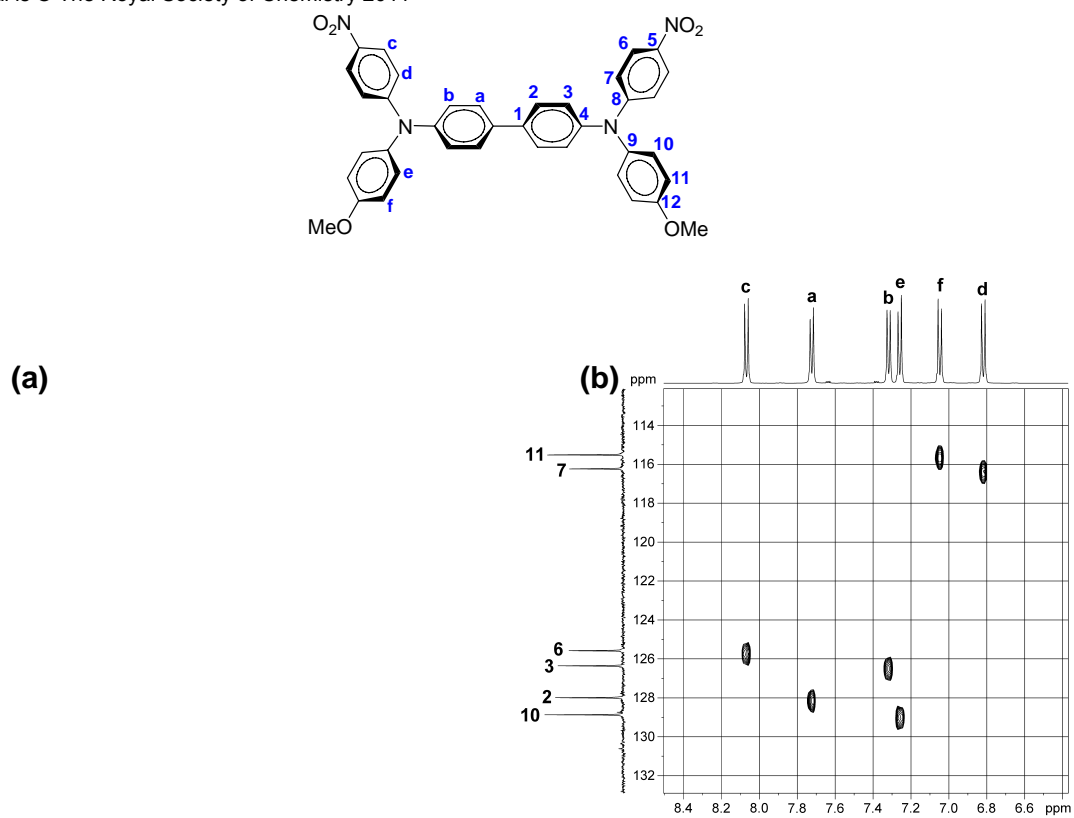

**Figure S3.** 2D (a) H-H COSY and (b) C-H HMQC NMR spectra of dinitro compound **1** in DMSO- $d_6$ .

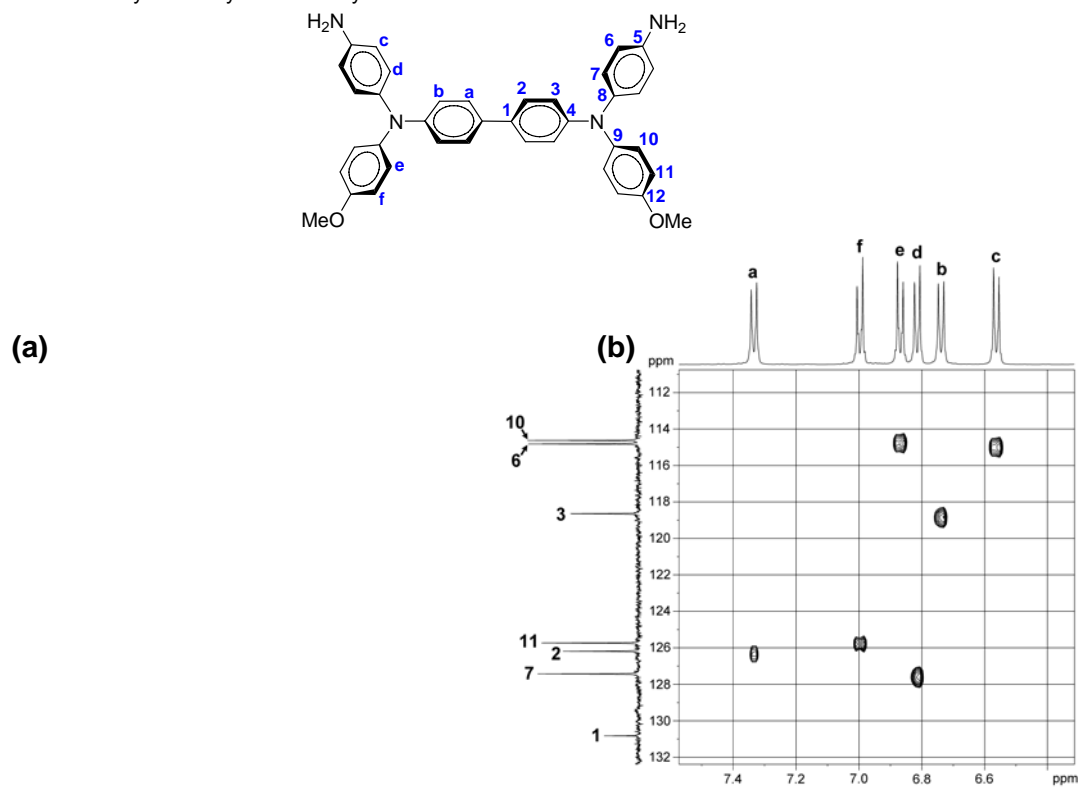

**Figure S4.** 2D (a) H-H COSY and (b) C-H HMQC NMR spectra of diamine monomer **2** in DMSO-*d*<sub>6</sub>.



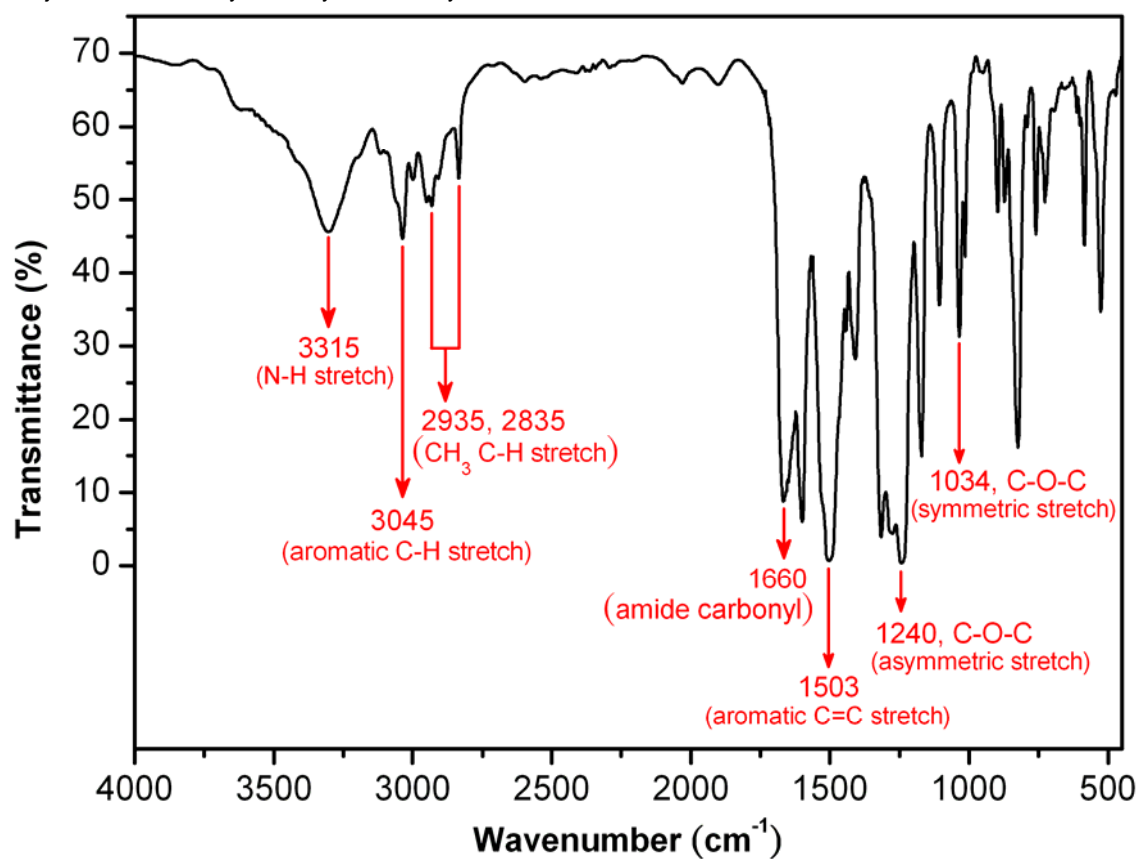

**Figure S5.** IR spectrum of polyamide **Ib** film.

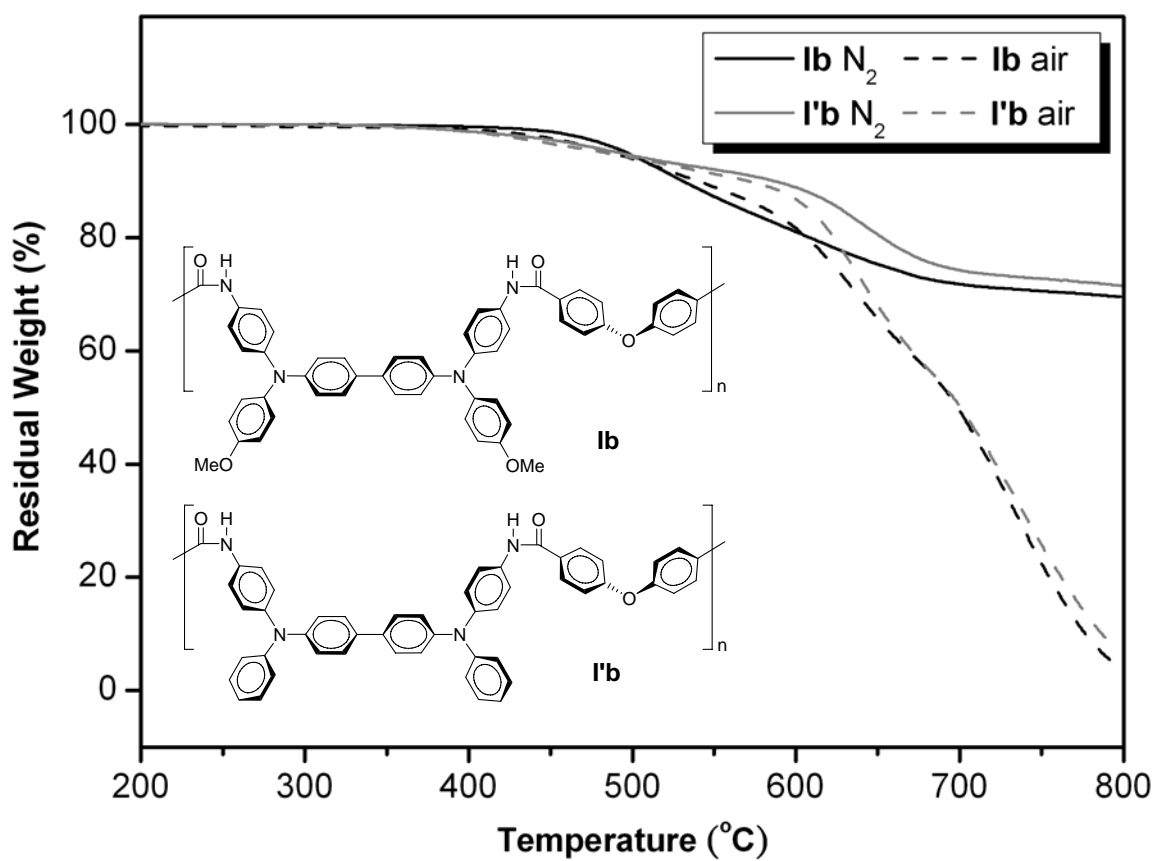

**Figure S6.** TGA thermograms of polyamides **Ib** and **I'b** at a scan rate of 20 °C/min.

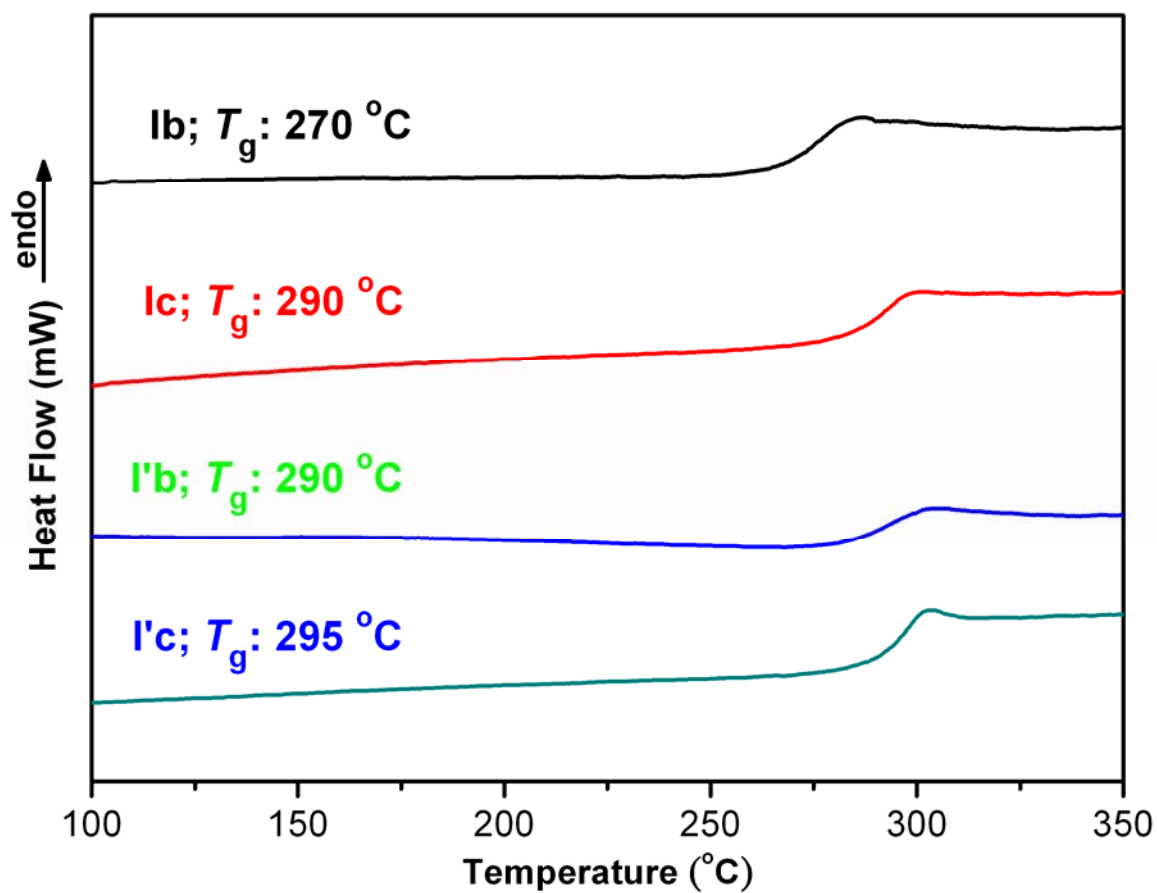

**Figure S7.** DSC traces of polyamides with a heating rate of 20 °C/min in nitrogen.
